# Supplementary material
Source: PubMed Central journal article supplement (PMC4026219)
Supplement: Supp_Fig1.pdf [file Supp_Fig1.pdf]

## Supplementary Data

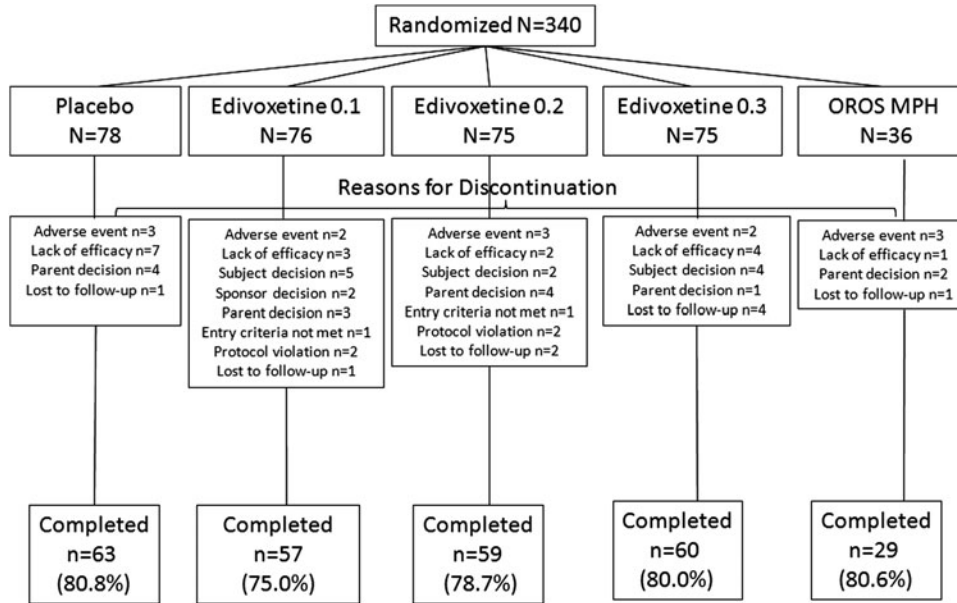

**SUPPLEMENTARY FIG. S1.** Patient disposition in the safety analyses data set. 0.1=0.1 mg/kg/day; 0.2=0.2 mg/kg/day; 0.3=0.3 mg/kg/day; OROS MPH= osmotic-release oral system methylphenidate; *n/N*= number of patients.
