# Supplementary material
Source: PubMed Central journal article supplement (PMC4026219)
Supplement: Supp_Table1.pdf [file Supp_Table1.pdf]

SUPPLEMENTARY TABLE S1. TREATMENT-EMERGENT ADVERSE EVENTS AND VITAL SIGNS (EFFICACY ANALYSES DATA SET)

*Treatment-emergent adverse events (occurring in  $\geq 5\%$  of patients in any edivoxetine group and twice the rate in placebo group)*

|                                                                             | Placebo (%)<br>n=63 | Edivoxetine 0.1 (%)<br>n=60 | Edivoxetine 0.2 (%)<br>n=60 | Edivoxetine 0.3 (%)<br>n=61 |
|-----------------------------------------------------------------------------|---------------------|-----------------------------|-----------------------------|-----------------------------|
| Upper abdominal pain                                                        | 9.5                 | 23.3*                       | 5.0                         | 14.8                        |
| Vomiting                                                                    | 4.8                 | 8.3                         | 15.0                        | 14.8                        |
| Decreased appetite                                                          | 4.8                 | 10.0                        | 13.3                        | 9.8                         |
| Nausea                                                                      | 6.3                 | 8.3                         | 15.0                        | 9.8                         |
| Fatigue                                                                     | 1.6                 | 5.0                         | 3.3                         | 4.9                         |
| Sedation                                                                    | 1.6                 | 1.7                         | 8.3                         | 4.9                         |
| Somnolence                                                                  | 7.9                 | 5.0                         | 20.0                        | 4.9                         |
| Constipation                                                                | 0.0                 | 3.3                         | 5.0                         | 3.3                         |
| Abdominal pain                                                              | 0.0                 | 0.0                         | 5.0                         | 1.6                         |
| Diarrhea                                                                    | 3.2                 | 6.7                         | 3.3                         | 1.6                         |
| Nasal congestion                                                            | 1.6                 | 0.0                         | 5.0                         | 1.6                         |
| Altered mood                                                                | 1.6                 | 1.7                         | 5.0                         | 0.0                         |
| <i>Vital signs, weight, and height</i>                                      |                     |                             |                             |                             |
| <i>LS mean change from baseline to week 8</i>                               |                     |                             |                             |                             |
| Weight (kg)                                                                 | 1.4                 | -0.03*                      | 0.3*                        | -0.3*                       |
| Height (cm)                                                                 | 0.8                 | 0.9                         | 0.7                         | 0.6                         |
| Pulse (bpm) sitting                                                         | -1.7                | 6.7*                        | 12.0*                       | 11.8*                       |
| Diastolic BP (mmHg) sitting                                                 | -0.9                | 5.0*                        | 6.4*                        | 4.5*                        |
| Systolic BP (mmHg) sitting                                                  | 0.2                 | 5.1*                        | 5.1*                        | 4.2*                        |
| <i>Percentage of patients with a categorical shift in BP at any time</i>    |                     |                             |                             |                             |
| Sitting diastolic BP increase $\geq 5$ mm Hg<br>and $\geq 95$ th percentile | 6.3                 | 17.2                        | 25.0*                       | 22.0*                       |
| Sitting systolic BP increase $\geq 5$ mm Hg<br>and $\geq 95$ th percentile  | 14.3                | 22.4                        | 28.3                        | 13.6                        |

\* $p < 0.05$  vs. placebo.

0.1=0.1 mg/kg; 0.2=0.2 mg/kg; 0.3=0.3 mg/kg.

BP, blood pressure; LS, least squares; QTc=corrected QT interval.
