# Supplementary material
Source: PubMed Central journal article supplement (PMC4026219)
Supplement: Supp_Table2.pdf [file Supp_Table2.pdf]

SUPPLEMENTARY TABLE S2. TREATMENT-EMERGENT ADVERSE EVENTS AND VITAL SIGNS: STIMULANT-NAÏVE PATIENTS

*Treatment-emergent adverse events (occurring in ≥5% of patients in any edivoxetine group and twice the rate in placebo group)*

|                      | Placebo (%)<br>n=44 | Edivoxetine<br>0.1 (%)<br>n=40 | Edivoxetine<br>0.2 (%)<br>n=38 | Edivoxetine<br>0.3 (%)<br>n=38 | OROS<br>MPH (%)<br>n=36 |
|----------------------|---------------------|--------------------------------|--------------------------------|--------------------------------|-------------------------|
| Nausea               | 2.3                 | 10.0                           | 15.8*                          | 23.7*                          | 8.3                     |
| Upper abdominal pain | 6.8                 | 17.5                           | 5.3                            | 18.4                           | 22.2                    |
| Decreased appetite   | 4.5                 | 7.5                            | 18.4                           | 15.8                           | 47.2*                   |
| Vomiting             | 2.3                 | 12.5                           | 10.5                           | 15.8*                          | 2.8                     |
| Aggression           | 0.0                 | 2.5                            | 0.0                            | 5.3                            | 5.6                     |
| Constipation         | 0.0                 | 2.5                            | 5.3                            | 5.3                            | 2.8                     |
| Heart rate increased | 0.0                 | 2.5                            | 0.0                            | 5.3                            | 2.8                     |
| Irritability         | 4.5                 | 15.0                           | 18.4                           | 5.3                            | 16.7                    |
| Mood altered         | 2.3                 | 2.5                            | 7.9                            | 5.3                            | 5.6                     |
| Initial insomnia     | 2.3                 | 5.0                            | 2.6                            | 2.6                            | 5.6                     |
| Sedation             | 0.0                 | 5.0                            | 7.9                            | 2.6                            | 8.3                     |
| Abdominal pain       | 0.0                 | 0.0                            | 5.3                            | 0.0                            | 2.8                     |
| Dysphoria            | 0.0                 | 0.0                            | 5.3                            | 0.0                            | 0.0                     |
| Eczema               | 0.0                 | 0.0                            | 5.3                            | 0.0                            | 0.0                     |
| Increased appetite   | 2.3                 | 7.5                            | 0.0                            | 0.0                            | 2.8                     |
| Oropharyngeal pain   | 2.3                 | 2.5                            | 5.3                            | 0.0                            | 5.6                     |
| Somnolence           | 9.1                 | 2.5                            | 18.4                           | 0.0                            | 0.0                     |

*Vital signs, weight, and height*

*LS mean change from baseline to week 8*

|                             |      |        |        |        |        |
|-----------------------------|------|--------|--------|--------|--------|
| Weight (kg)                 | 0.79 | -0.15* | -0.07* | -0.52* | -1.85* |
| Height (cm)                 | 1.1  | 1.2    | 1.1    | 0.8    | 0.9    |
| Pulse (bpm) sitting         | -2.1 | 4.8*   | 10.1*  | 10.0*  | 4.5*   |
| Diastolic BP (mmHg) sitting | -0.2 | 8.1*   | 5.7*   | 6.2*   | 2.9    |
| Systolic BP (mmHg) sitting  | 2.1  | 6.6    | 6.2    | 5.0    | 2.8    |

*Percentage of patients with potentially clinically significant QTc changes at any time*

|                                   |      |     |     |     |     |
|-----------------------------------|------|-----|-----|-----|-----|
| QTc Fridericia's >30 ms increase  | 0.0  | 2.8 | 2.9 | 0.0 | 2.9 |
| QTc Fridericia's >450 ms increase | 0.00 | 2.8 | 2.9 | 0.0 | 0.0 |

*Percentage of patients with a categorical shift in BP*

|                               |              |      |      |       |       |      |
|-------------------------------|--------------|------|------|-------|-------|------|
| Sitting diastolic BP increase | At end-point | 2.3  | 10.5 | 8.3   | 5.6   | 5.7  |
| ≥5 mmHg and ≥95th percentile  | At any time  | 11.4 | 26.3 | 30.6* | 30.6* | 11.4 |
| Sitting systolic BP increase  | At end-point | 9.1  | 7.9  | 8.3   | 2.8   | 2.9  |
| ≥5 mmHg and ≥95th percentile  | At any time  | 20.5 | 21.1 | 30.6  | 19.4  | 25.7 |

\* $p < 0.05$  vs. placebo.

0.1=0.1 mg/kg/day; 0.2=0.2 mg/kg/day; 0.3=0.3 mg/kg/day.

BP, blood pressure; LS, least squares; QTc, corrected QT interval.
